# Supplementary material
Source: HighWire-hosted journal article supplement (http://bmjopenquality.bmj.com/highwire/filestream/136174/field_highwire_adjunct_files/1/ds6307.pdf)
Supplement: ds6307.pdf [file ds6307.pdf]

**Chronic Pain Flowchart** 1. Assess patient using appropriate tool.

2. Ensure patient is prescribed Paracetamol according to weight

3. Add NSAID (Ibuprofen/Naproxen) and PPI (if over 45yrs old) Review effect after 2 weeks. Not for long term use. Monitor renal function

4. Add Codeine 30-60mg QDS OR Tramadol 50-100mg QDS Assess 10% Patients do not respond to codeine and is constipating so for short term use.

**5. REASSESS PATIENT.**

- Before prescribing stronger opioids, consider that there is little evidence to support long term use of opiates, and there are endocrine and immunological risks e.g. opioid induced hypogonadism
- It is unlikely that an alternative opioid will work where morphine has not
- Opioids are NOT usually helpful for Mechanical back pain, Fibromyalgia, Pelvic or Abdominal pain, or non-specific visceral pain - only use in these conditions with advice from specialists

**6. STOP Tramadol/Codeine; ADD Morphine SR** (Zomorph Caps 10-20mg BD)

- Titrate by no more than 10mg BD morphine at a time to maximum 120mg per day - Discuss with pain specialist nurses (see guidelines for referral on intraset pain management)
- Assess abuse potential
- Do not increase dose without seeing patient
- If patient does not gain 30-50% pain relief within 2-4 weeks consider withdrawing opioid.
- If pain not responding to opioids it could be neuropathic pain (i.e. stabbing, burning, tingling descriptors) - see neuropathic guidelines

Guidelines for the pharmacological management of non-cancer pain in adults (2018) Contact [search.library@hpa.nhs.uk](mailto:search.library@hpa.nhs.uk) for more copies

**ACUTE PAIN MANAGEMENT:**

Step 1 : Paracetamol and NSAID (unless contraindicated)

Step 2 : Add Tramadol (50-100mg QDS) or codeine (30-60mg QDS)

Step 3 : Add an Opioid

Top tip:  
- Opioid step 1+2 are prescribed on the regular side  
- If a patient is needing a step 3 drug (PRN) make sure they are taking the step 1+2 drugs as well  
- SEE GUIDELINES FOR REFERRAL TO PAIN SERVICE BEFORE MAKING A REFERRAL.

Version 1.0/2019

- Effective analgesia means at least 30% reduction in mean pain score.
- EXHAUSTION - If a patient is still in pain they do not always need a PCA - consider IV Paracetamol and IV Tramadol.
- Oral Codeine is twice as strong as morphine but the same IV.

| Morphine Equivalent                  | 10 | 15 | 30  | 40  | 45 | 60 | 90   | 120 |
|--------------------------------------|----|----|-----|-----|----|----|------|-----|
| Oral Codeine (mg/24hrs)              |    |    | 240 |     |    |    |      |     |
| Oral Tramadol (mg/24hrs)             |    |    | 300 | 400 |    |    |      |     |
| Transdermal Buprenorphine (µg/24hrs) | 5  | 10 | 20  |     |    | 35 | 52.5 | 70  |
| Transdermal Fentanyl (mg/24hrs)      |    |    |     |     | 12 |    |      |     |
| Oral Dihydrocodeine (mg/24hrs)       | 80 |    |     |     |    |    |      |     |
